# Supplementary material
Source: HighWire-hosted journal article supplement (https://erj.ersjournals.com/content/59/5/2101293)

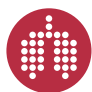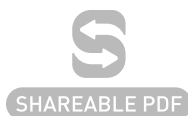

# *Rothia mucilaginosa* is an anti-inflammatory bacterium in the respiratory tract of patients with chronic lung disease

Charlotte Rigauts<sup>1</sup>, Juliana Aizawa<sup>2</sup>, Steven L. Taylor<sup>3,4</sup>, Geraint B. Rogers<sup>3,4</sup>, Matthias Govaerts<sup>2</sup>, Paul Cos<sup>2</sup>, Lisa Ostyn<sup>1</sup>, Sarah Sims<sup>3,4</sup>, Eva Vandeplasseche<sup>1</sup>, Mozes Sze<sup>5,6</sup>, Yves Dondelinger<sup>5,6</sup>, Lars Vereecke<sup>5,7</sup>, Heleen Van Acker<sup>1</sup>, Jodie L. Simpson<sup>8</sup>, Lucy Burr<sup>9,10</sup>, Anne Willems<sup>11</sup>, Michael M. Tunney<sup>12</sup>, Cristina Cigana<sup>13</sup>, Alessandra Bragonzi<sup>13</sup>, Tom Coenye<sup>13</sup> and Aurélie Crabbé<sup>1</sup>

<sup>1</sup>Laboratory of Pharmaceutical Microbiology, Ghent University, Ghent, Belgium. <sup>2</sup>Laboratory of Microbiology, Parasitology and Hygiene, University of Antwerp, Wilrijk, Belgium. <sup>3</sup>Microbiome and Host Health Programme, South Australian Health and Medical Research Institute (SAHMRI), Adelaide, Australia. <sup>4</sup>The SAHMRI Microbiome Research Laboratory, College of Medicine and Public Health, Flinders University, Adelaide, Australia. <sup>5</sup>VIB Center for Inflammation Research, Ghent, Belgium. <sup>6</sup>Dept of Biomedical Molecular Biology, Ghent University, Ghent, Belgium. <sup>7</sup>Dept of Rheumatology, Ghent University, Ghent, Belgium. <sup>8</sup>Faculty of Health and Medicine, Priority Research Centre for Healthy Lungs, University of Newcastle, Callaghan, Australia. <sup>9</sup>Dept of Respiratory Medicine, Mater Health Services, South Brisbane, Australia. <sup>10</sup>Mater Research, University of Queensland, South Brisbane, Australia. <sup>11</sup>Laboratory of Microbiology, Dept of Biochemistry and Microbiology, Ghent University, Ghent, Belgium. <sup>12</sup>School of Pharmacy, Queen's University Belfast, Belfast, UK. <sup>13</sup>Infections and Cystic Fibrosis Unit, Division of Immunology, Transplantation and Infectious Diseases, IRCCS San Raffaele Scientific Institute, Milan, Italy.

Corresponding author: Aurélie Crabbé (aurelie.crabbe@ugent.be)

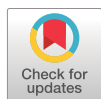

Shareable abstract (@ERSpublications)

**A commensal bacterium of the lower airways, *Rothia mucilaginosa*, inhibits inflammation by NF- $\kappa$ B pathway inactivation. *R. mucilaginosa* abundance inversely correlates with sputum pro-inflammatory markers in chronic lung disease, indicating a beneficial role.** <https://bit.ly/3INT9th>

**Cite this article as:** Rigauts C, Aizawa J, Taylor SL, et al. *Rothia mucilaginosa* is an anti-inflammatory bacterium in the respiratory tract of patients with chronic lung disease. *Eur Respir J* 2022; 59: 2101293 [DOI: 10.1183/13993003.01293-2021].

This single-page version can be shared freely online.

Copyright ©The authors 2022.

This version is distributed under the terms of the Creative Commons Attribution Non-Commercial Licence 4.0. For commercial reproduction rights and permissions contact [permissions@ersnet.org](mailto:permissions@ersnet.org)

This article has an editorial commentary:  
<https://doi.org/10.1183/13993003.03079-2021>

Received: 5 May 2021  
Accepted: 10 Sept 2021

## Abstract

**Background** Chronic airway inflammation is the main driver of pathogenesis in respiratory diseases such as severe asthma, chronic obstructive pulmonary disease, cystic fibrosis (CF) and bronchiectasis. While the role of common pathogens in airway inflammation is widely recognised, the influence of other microbiota members is still poorly understood.

**Methods** We hypothesised that the lung microbiota contains bacteria with immunomodulatory activity which modulate net levels of immune activation by key respiratory pathogens. Therefore, we assessed the immunomodulatory effect of several members of the lung microbiota frequently reported as present in CF lower respiratory tract samples.

**Results** We show that *Rothia mucilaginosa*, a common resident of the oral cavity that is also often detectable in the lower airways in chronic disease, has an inhibitory effect on pathogen- or lipopolysaccharide-induced pro-inflammatory responses, *in vitro* (three-dimensional cell culture model) and *in vivo* (mouse model). Furthermore, in a cohort of adults with bronchiectasis, the abundance of *Rothia* species was negatively correlated with pro-inflammatory markers (interleukin (IL)-8 and IL-1 $\beta$ ) and matrix metalloproteinase (MMP)-1, MMP-8 and MMP-9 in sputum. Mechanistic studies revealed that *R. mucilaginosa* inhibits NF- $\kappa$ B pathway activation by reducing the phosphorylation of I $\kappa$ B $\alpha$  and consequently the expression of NF- $\kappa$ B target genes.

**Conclusions** These findings indicate that the presence of *R. mucilaginosa* in the lower airways potentially mitigates inflammation, which could in turn influence the severity and progression of chronic respiratory disorders.

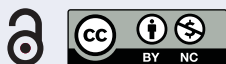

Supplement: inline-supplementary-material-2 [file inline-supplementary-material-2.pdf]
